# Supplementary material
Source: Springer Nature journal article supplement (https://www.springermedizin.de/resource/supplementary/12968_2009_530_MOESM1_ESM.pdf/9579190)

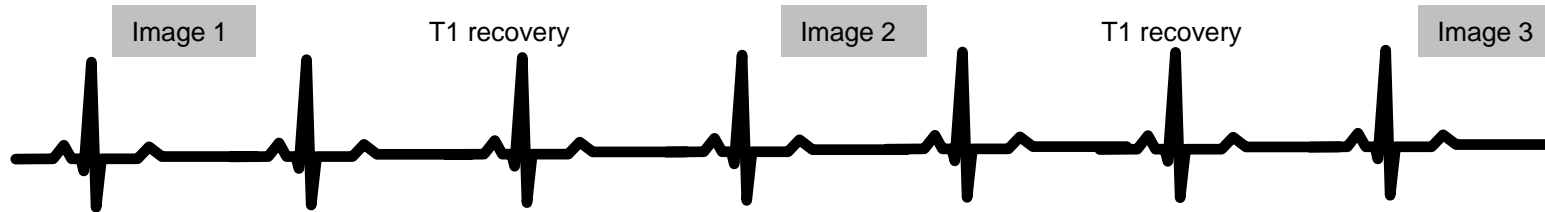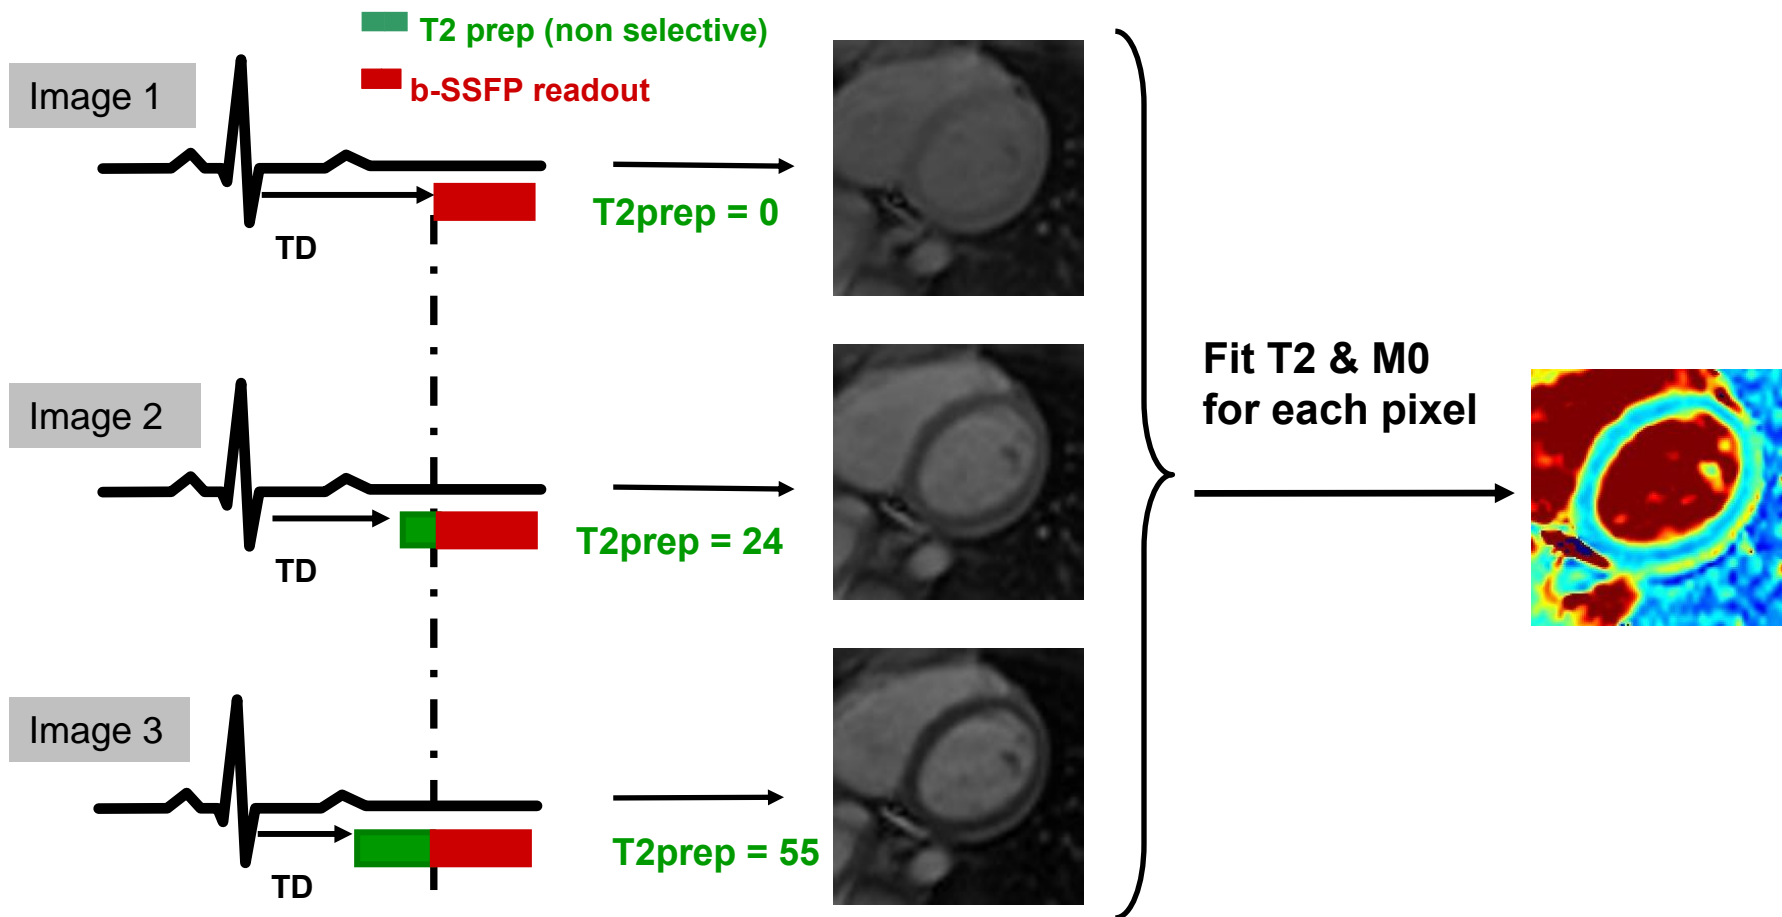

Supplement: MOESM1 [file 9579190]
